# Supplementary material for: Sequence Analysis and Structure Prediction of SARS-CoV-2 Accessory Proteins 9b and ORF14: Evolutionary Analysis Indicates Close Relatedness to Bat Coronavirus
Source: Biomed Res Int. 2020 Oct 20;2020:7234961. doi: 10.1155/2020/7234961 (PMC7576348; doi:10.1155/2020/7234961)
Supplement: Supplementary Materials — Table S1: computed cavities in the 3D structure of ORF9b protein for active sites. Table S2: computed cavities in the 3D structure of ORF14 protein for active sites. Figure S1: secondary structure profile of 9b protein. Figure S2: secondary structure profile of ORF14 protein. Figure S3: QMEANDisCo local quality estimate for 9b protein. Figure S4: QMEANDisCo local quality estimate for ORF14 protein. Figure S5: protein 9b structure verification in ERRAT. Figure S6: protein ORF14 structure verification in ERRAT. Figure S7: profile of tunnel 1 in 9b protein. Figure S8: profile of tunnel 2 in 9b protein. Figure S9: tunnel-profile of ORF14 protein. Figure S10: hydropathicity plot for 9b protein. Figure S11: hydrophobicity plot for ORF14 protein. Annexure 1: protein 9b structure verification. Annexure 2: ORF14 protein structure verification. [file 7234961.f1.zip]

Archive with 15 entries (15 files):
- Annexure 1_Protein 9b structure verification.rtf
- Annexure 2_ORF 14 protein_structure verification.rtf
- Figure S1_orf 9b_secondary structure.pptx
- Figure S10_orf9b Hydrophobicity plot.pptx
- Figure S11_orf14_Hydrophobicity plot.pptx
- Figure S2_ORF 14 secondary structure.pptx
- Figure S3_9b_Local_quality_estimate.pptx
- Figure S4_ORF14_Local_quality_estimate.pptx
- Figure S5_Structure of 9b_ERRAT verification.pptx
- Figure S6_Structure of ORF14_ERRAT verification.pptx
- Figure S7_orf9b tunnel1-profile.pptx
- Figure S8_orf9b tunnel2-profile.pptx
- Figure S9_orf14 protin tunnel-profile.pptx
- Table S1_computed cavities for active sites_9b.docx
- Table S2_computed cavities for active sites_ORF14.docx
